# Supplementary material for: Plasma Metabolites and Liver Composition of Broilers in Response to Dietary Ulva lactuca with Ulvan Lyase or a Commercial Enzyme Mixture
Source: MDPI journal article supplement (doi:10.3390/molecules27217425), 2022-11-01
Supplement: s1 [file s1]

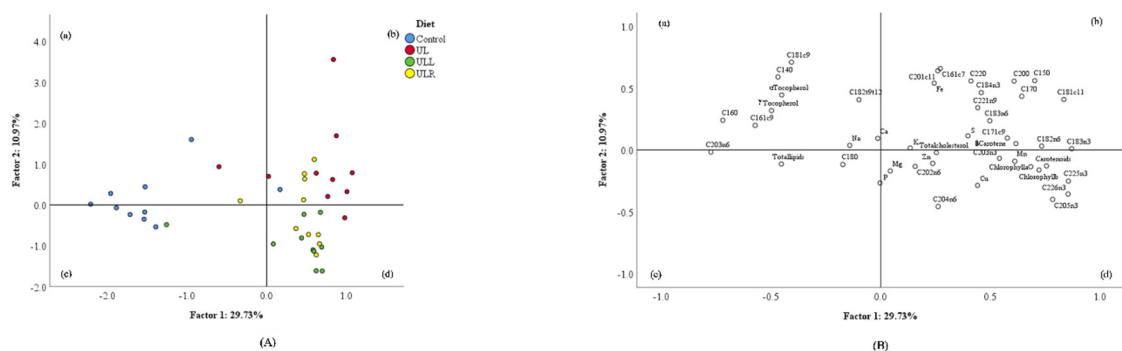

**Figure S1:** Loading plot of the first and second principal factors of the pooled data (A) and component score vectors (B) using hepatic metabolites from broilers fed with different diets: Control, corn-soybean based-diet; UL, based-diet plus 15% *U. lactuca*; ULR, UL diet with 0.005% commercial CAzyme (Rovabio® Excel AP); ULL, UL diet with 0.01% recombinant ulvan lyase.

**Table S1.** Chemical composition of seaweed *Ulva lactuca* and experimental diets ( $n=3$ ) [18].

| Item                                              | <i>U. lactuca</i> | Control | UL   | ULR  | ULL  |
|---------------------------------------------------|-------------------|---------|------|------|------|
| Energy, kcal ME <sup>†</sup> /kg as dry matter    | 2664              | 4649    | 4672 | 4607 | 4597 |
| Proximate composition (g/100 g dry matter)        |                   |         |      |      |      |
| Dry matter                                        | 88.7              | 89.0    | 89.2 | 89.3 | 89.4 |
| Crude protein                                     | 28.2              | 23.3    | 23.1 | 22.8 | 23.3 |
| Crude fat                                         | 2.85              | 8.81    | 9.00 | 9.75 | 10.3 |
| Ash                                               | 31.7              | 6.58    | 8.83 | 8.77 | 8.86 |
| Fatty acid profile (g/100 g of total fatty acids) |                   |         |      |      |      |
| 14:0                                              | 0.61              | 0.01    | 0.13 | 0.11 | 0.11 |
| 16:0                                              | 33.6              | 9.86    | 9.88 | 9.96 | 9.87 |
| 16:1c9                                            | 4.17              | 0.15    | 0.27 | 0.25 | 0.25 |
| 17:0                                              | 0.58              | 0.06    | 0.04 | 0.05 | 0.05 |
| 17:1c9                                            | 0.96              | 0.03    | 0.03 | 0.03 | 0.03 |
| 18:0                                              | 1.26              | 3.17    | 3.14 | 3.20 | 3.21 |
| 18:1c9                                            | 14.9              | 29.6    | 28.7 | 28.5 | 27.9 |
| 18:2n-6                                           | 6.14              | 53.5    | 52.5 | 52.7 | 53.4 |
| 18:3n-3                                           | 17.3              | 1.15    | 1.41 | 1.46 | 1.38 |
| 18:4n-3                                           | 12.8              | n.d.    | 0.73 | 0.71 | 0.66 |
| 20:0                                              | 0.34              | 0.37    | 0.37 | 0.37 | 0.37 |
| 20:4n-6                                           | 0.96              | n.d.    | 0.02 | 0.03 | 0.03 |
| 20:5n-3                                           | 0.90              | 0.03    | 0.04 | 0.04 | 0.04 |
| 22:0                                              | 1.54              | 0.61    | 0.64 | 0.63 | 0.67 |
| Diterpene profile (µg/100 g)                      |                   |         |      |      |      |
| α-Tocopherol                                      | 79.3              | 254     | 254  | 234  | 224  |
| α-Tocotrienol                                     | n.d. <sup>#</sup> | 5.00    | 3.26 | 3.56 | 2.77 |
| β-Tocopherol                                      | n.d.              | 0.72    | 0.77 | 0.74 | 0.72 |
| γ-Tocopherol+β-Tocotrienol                        | n.d.              | 5.47    | 4.15 | 4.18 | 3.57 |
| γ-Tocotrienol                                     | n.d.              | 6.18    | 4.09 | 4.54 | 3.46 |
| δ-Tocopherol                                      | n.d.              | 0.96    | 0.69 | 0.73 | 0.70 |
| Pigments (mg/100 g)                               |                   |         |      |      |      |
| β-Carotene                                        | 170               | 1.28    | 33.6 | 28.3 | 28.4 |
| Chlorophyll <i>a</i> <sup>1</sup>                 | 2311              | 5.78    | 599  | 589  | 588  |
| Chlorophyll <i>b</i> <sup>2</sup>                 | 1666              | 8.46    | 438  | 424  | 428  |
| Total Carotenoids <sup>3</sup>                    | 510               | 6.04    | 145  | 144  | 134  |

| Mineral profile (mg/kg dry matter) |       |       |       |       |       |
|------------------------------------|-------|-------|-------|-------|-------|
| Bromine                            | 694   | 4.10  | 211   | 157   | 177   |
| Calcium                            | 6202  | 20263 | 11315 | 11195 | 11756 |
| Copper                             | 3.73  | 17.8  | 16.4  | 19.1  | 19.7  |
| Iodine                             | 45.1  | 1.09  | 14.0  | 11.2  | 11.7  |
| Iron                               | 537   | 296   | 343   | 310   | 326   |
| Magnesium                          | 25889 | 2723  | 7826  | 7913  | 8189  |
| Manganese                          | 39.0  | 154   | 128   | 128   | 139   |
| Phosphorous                        | 2786  | 10728 | 8941  | 8918  | 9284  |
| Potassium                          | 38822 | 15850 | 21079 | 21462 | 21639 |
| Sodium                             | 52133 | 3388  | 13727 | 13924 | 15122 |
| Sulphur                            | 49265 | 3379  | 14423 | 14670 | 15098 |
| Zinc                               | 8.96  | 121   | 100   | 113   | 107   |

Diets: Control, corn-soybean based-diet; UL, based-diet plus 15% *U. lactuca*; ULR, UL diet with 0.005% commercial CAZyme (Rovabio® Excel AP); ULL, UL diet with 0.01% recombinant ulvan lyase.

<sup>†</sup> ME, metabolized energy; <sup>‡</sup>Co-eluted with  $\alpha$ -tocopherol; n.d., not detected.

<sup>1</sup> Ca = 11.24 A662 - 2.04 A645.

<sup>2</sup> Cb = 20.13 A645 - 4.19 A662.

<sup>3</sup> Ca+b = 7.05 A662 + 18.09 A645.

18. Costa, M.M.; Pestana, J.M.; Carvalho, P.; Alfaia, C.M.; Martins, C.F.; Carvalho, D.; Mourato, M.; Gueifão, S.; Delgado, I.; Coelho, I.; Lemos, J.P.C.; Lordelo, M.M.; Prates, J.A.M. Effect on Broiler Production Performance and Meat Quality of Feeding *Ulva lactuca* Supplemented with Carbohydrases. *Animals* **2022**, *12*, 1720. <https://doi.org/10.3390/ani12131720>
